# Supplementary material for: Membranes combining chitosan and natural-origin nanoliposomes for tissue engineering
Source: Royal Society of Chemistry journal article supplement (doi:10.1039/c6ra13568d), 2016-01-01
Supplement: c6ra13568d1.pdf [file c6ra13568d1.pdf]

Supplemental documents

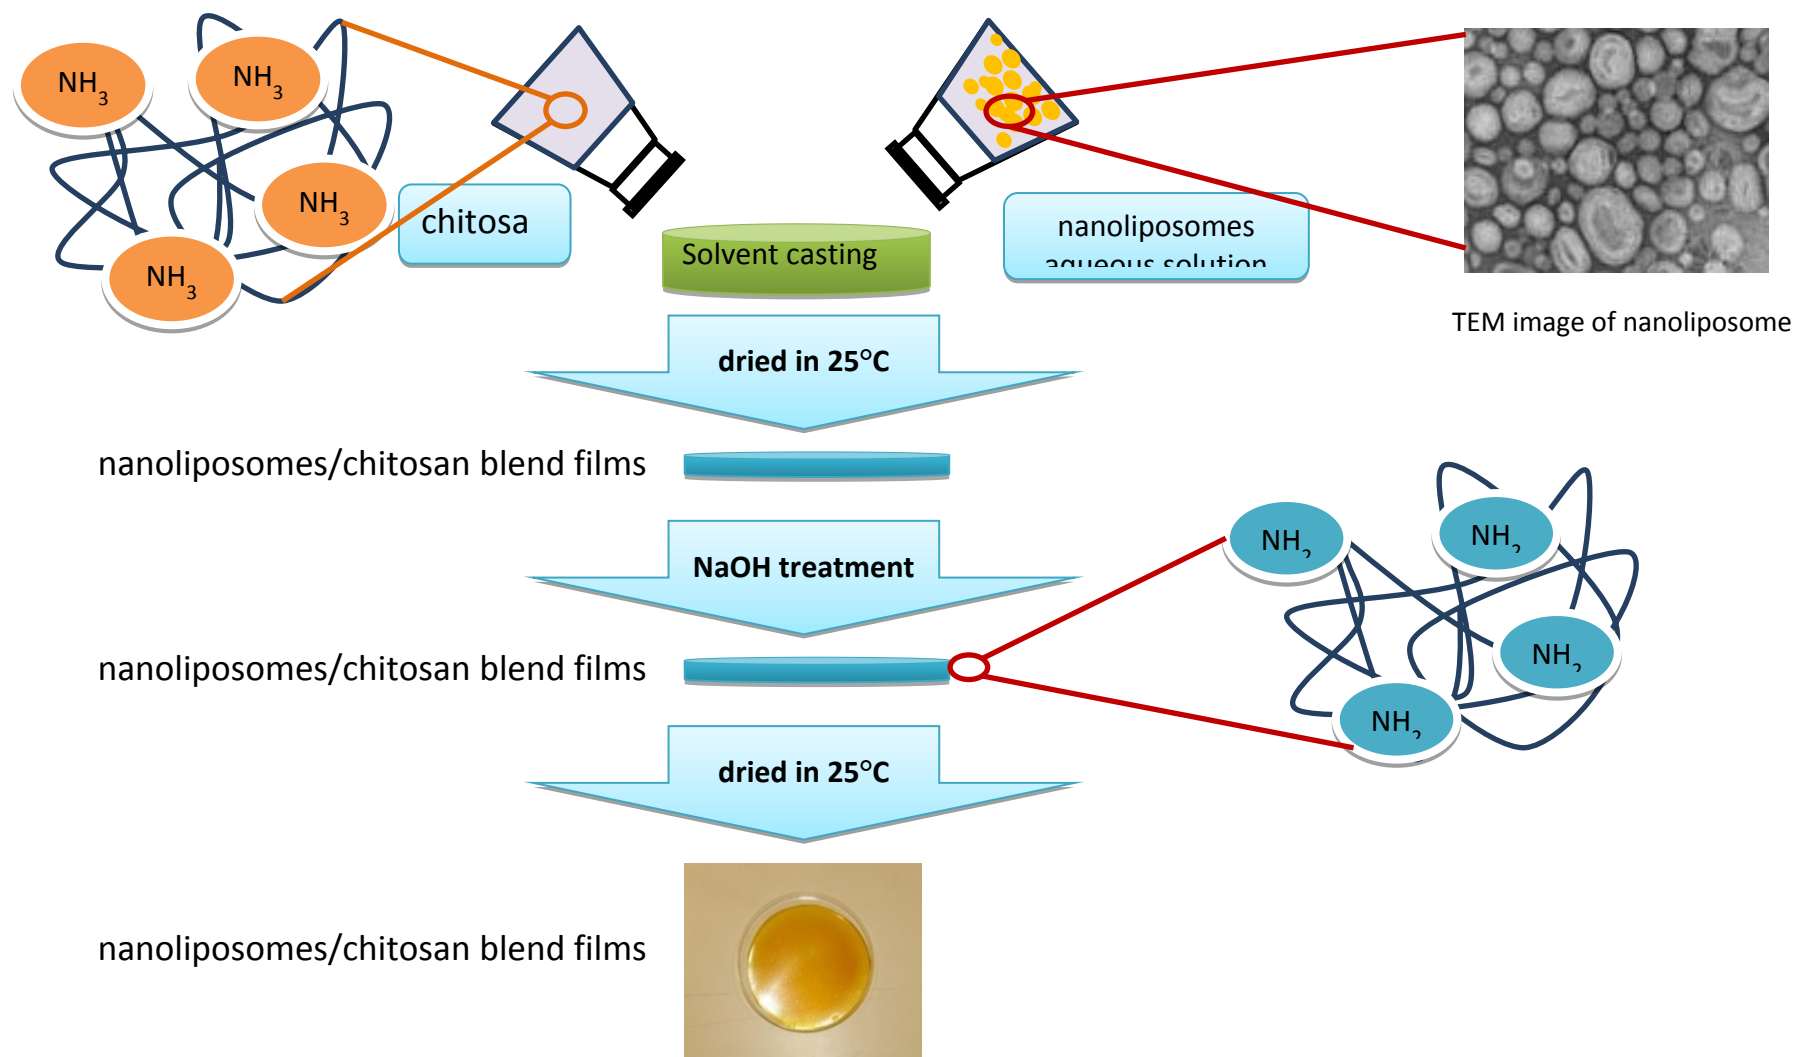

Schematic illustration of functionalized chitosan thin film preparation.

7D

14D

21D

chitosan

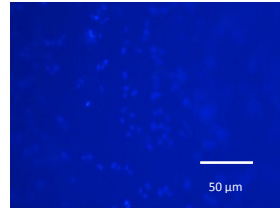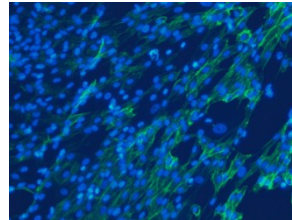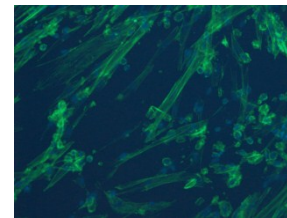

soya/cht 0.5 %

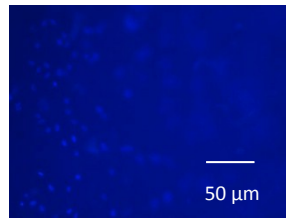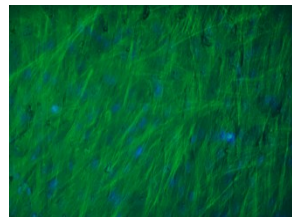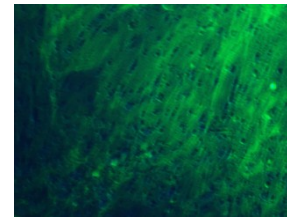

soya/cht 1 %

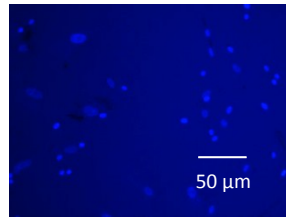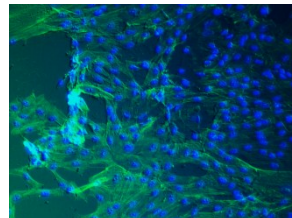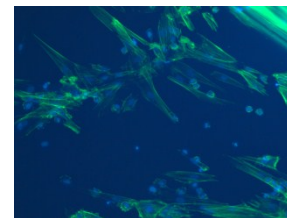

salmon/cht 0.5 %

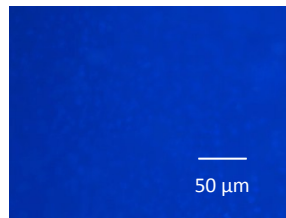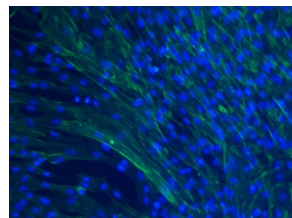

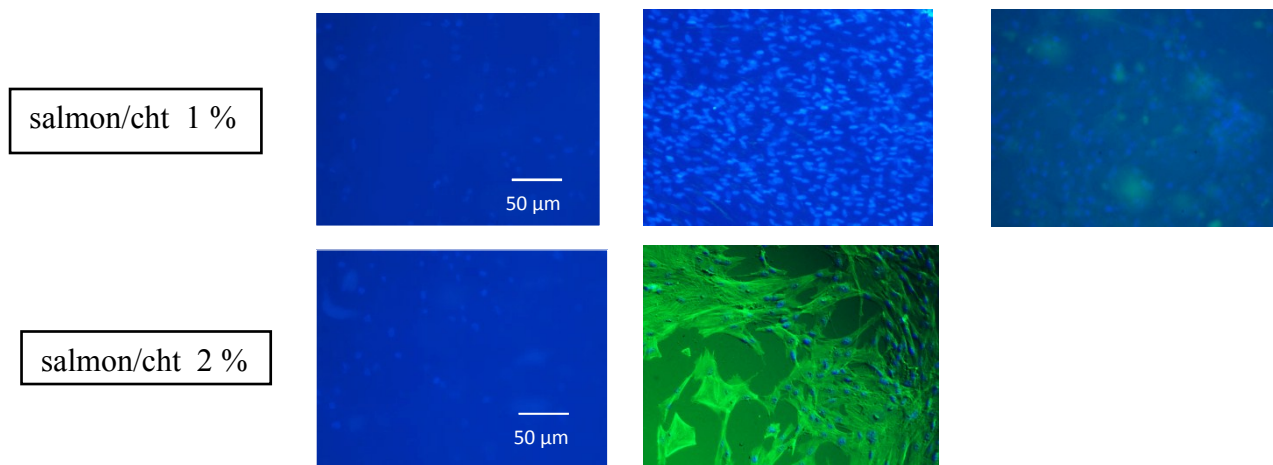

**Human mesenchymal stem cells (hMSCs) attachment and spreading on nanoliposomes functionalized chitosan films at 7<sup>th</sup>, 14<sup>th</sup> and 21<sup>st</sup> day.** Ns-cht and nf-cht mean soya and salmon nanoliposomes/chitosan blend films, respectively. 1, 2, and 4 indicate that the concentrations of nanoliposomes are 1, 2, and 4 mg/mL.
